# Supplementary material
Source: publisher site journal article supplement (https://www.dovepress.com/article/supplementary_file/626574/626574%20Revised%20Supplementary%20Material.docx)
Supplement: Supplementary file 1 [file 626574%20Revised%20Supplementary%20Material.docx]

# Supplementary Material

**Supplementary Table 1.** De-identified paired SpO₂–SaO₂ dataset from the controlled hypoxemia study (432 observations from 18 healthy volunteers).

| **Subject ID** | **Round** | **Sequence** | **SpO₂ (%)** | **SaO₂ (%)** | **Error (SpO₂−SaO₂) (%)** | **SaO₂ Range** |
| --- | --- | --- | --- | --- | --- | --- |
| S01 | 1 | 1 | 98 | 98.7 | -0.7 | 90–100% |
| S01 | 1 | 2 | 99 | 98.8 | 0.2 | 90–100% |
| S01 | 1 | 3 | 93 | 93.8 | -0.8 | 90–100% |
| S01 | 1 | 4 | 92 | 93.2 | -1.2 | 90–100% |
| S01 | 1 | 5 | 86 | 88.2 | -2.2 | 80–89% |
| S01 | 1 | 6 | 87 | 87.7 | -0.7 | 80–89% |
| S01 | 1 | 7 | 85 | 85.1 | -0.1 | 80–89% |
| S01 | 1 | 8 | 83 | 84.3 | -1.3 | 80–89% |
| S01 | 1 | 9 | 76 | 77.1 | -1.1 | 70-75% |
| S01 | 1 | 10 | 73 | 76 | -3 | 70-75% |
| S01 | 1 | 11 | 72 | 75.7 | -3.7 | 70-75% |
| S01 | 1 | 12 | 100 | 99.1 | 0.9 | 90–100% |
| S01 | 2 | 1 | 99 | 98.7 | 0.3 | 90–100% |
| S01 | 2 | 2 | 100 | 99 | 1 | 90–100% |
| S01 | 2 | 3 | 95 | 93.6 | 1.4 | 90–100% |
| S01 | 2 | 4 | 95 | 93.7 | 1.3 | 90–100% |
| S01 | 2 | 5 | 90 | 89.2 | 0.8 | 80–89% |
| S01 | 2 | 6 | 89 | 88.6 | 0.4 | 80–89% |
| S01 | 2 | 7 | 83 | 82.5 | 0.5 | 80–89% |
| S01 | 2 | 8 | 83 | 81.9 | 1.1 | 80–89% |
| S01 | 2 | 9 | 77 | 76.5 | 0.5 | 70-75% |
| S01 | 2 | 10 | 78 | 76.9 | 1.1 | 70-75% |
| S01 | 2 | 11 | 75 | 73.9 | 1.1 | 70-75% |
| S01 | 2 | 12 | 74 | 74.9 | -0.9 | 70-75% |
| S02 | 1 | 1 | 98 | 98 | 0 | 90–100% |
| S02 | 1 | 2 | 98 | 97.7 | 0.3 | 90–100% |
| S02 | 1 | 3 | 94 | 94 | 0 | 90–100% |
| S02 | 1 | 4 | 94 | 94.1 | -0.1 | 90–100% |
| S02 | 1 | 5 | 88 | 87.1 | 0.9 | 80–89% |
| S02 | 1 | 6 | 89 | 87.6 | 1.4 | 80–89% |
| S02 | 1 | 7 | 82 | 81.2 | 0.8 | 80–89% |
| S02 | 1 | 8 | 82 | 80.7 | 1.3 | 80–89% |
| S02 | 1 | 9 | 77 | 77 | 0 | 70-75% |
| S02 | 1 | 10 | 76 | 76.4 | -0.4 | 70-75% |
| S02 | 1 | 11 | 74 | 73.3 | 0.7 | 70-75% |
| S02 | 1 | 12 | 73 | 73.3 | -0.3 | 70-75% |
| S02 | 2 | 1 | 99 | 99.5 | -0.5 | 90–100% |
| S02 | 2 | 2 | 100 | 99.5 | 0.5 | 90–100% |
| S02 | 2 | 3 | 93 | 93.6 | -0.6 | 90–100% |
| S02 | 2 | 4 | 96 | 93.9 | 2.1 | 90–100% |
| S02 | 2 | 5 | 89 | 87.4 | 1.6 | 80–89% |
| S02 | 2 | 6 | 88 | 86.5 | 1.5 | 80–89% |
| S02 | 2 | 7 | 82 | 80.8 | 1.2 | 80–89% |
| S02 | 2 | 8 | 83 | 80.6 | 2.4 | 80–89% |
| S02 | 2 | 9 | 78 | 77.4 | 0.6 | 70-75% |
| S02 | 2 | 10 | 76 | 77.4 | -1.4 | 70-75% |
| S02 | 2 | 11 | 73 | 71.3 | 1.7 | 70-75% |
| S02 | 2 | 12 | 73 | 70.3 | 2.7 | 70-75% |
| S03 | 1 | 1 | 98 | 98 | 0 | 90–100% |
| S03 | 1 | 2 | 98 | 98 | 0 | 90–100% |
| S03 | 1 | 3 | 93 | 92 | 1 | 90–100% |
| S03 | 1 | 4 | 91 | 91.6 | -0.6 | 90–100% |
| S03 | 1 | 5 | 87 | 87.3 | -0.3 | 80–89% |
| S03 | 1 | 6 | 87 | 86.4 | 0.6 | 80–89% |
| S03 | 1 | 7 | 81 | 81.6 | -0.6 | 80–89% |
| S03 | 1 | 8 | 81 | 80.5 | 0.5 | 80–89% |
| S03 | 1 | 9 | 73 | 74.6 | -1.6 | 70-75% |
| S03 | 1 | 10 | 72 | 74.6 | -2.6 | 70-75% |
| S03 | 1 | 11 | 70 | 71.1 | -1.1 | 70-75% |
| S03 | 1 | 12 | 68 | 71.3 | -3.3 | 70-75% |
| S03 | 2 | 1 | 99 | 97.9 | 1.1 | 90–100% |
| S03 | 2 | 2 | 99 | 98.4 | 0.6 | 90–100% |
| S03 | 2 | 3 | 93 | 92.1 | 0.9 | 90–100% |
| S03 | 2 | 4 | 94 | 92.4 | 1.6 | 90–100% |
| S03 | 2 | 5 | 88 | 86.8 | 1.2 | 80–89% |
| S03 | 2 | 6 | 88 | 86.8 | 1.2 | 80–89% |
| S03 | 2 | 7 | 84 | 83.1 | 0.9 | 80–89% |
| S03 | 2 | 8 | 84 | 82.9 | 1.1 | 80–89% |
| S03 | 2 | 9 | 72 | 72.5 | -0.5 | 70-75% |
| S03 | 2 | 10 | 72 | 72.5 | -0.5 | 70-75% |
| S03 | 2 | 11 | 71 | 72 | -1 | 70-75% |
| S03 | 2 | 12 | 70 | 70.9 | -0.9 | 70-75% |
| S04 | 1 | 1 | 99 | 99 | 0 | 90–100% |
| S04 | 1 | 2 | 97 | 98.7 | -1.7 | 90–100% |
| S04 | 1 | 3 | 92 | 93.3 | -1.3 | 90–100% |
| S04 | 1 | 4 | 94 | 93.4 | 0.6 | 90–100% |
| S04 | 1 | 5 | 89 | 88.9 | 0.1 | 80–89% |
| S04 | 1 | 6 | 87 | 88.3 | -1.3 | 80–89% |
| S04 | 1 | 7 | 83 | 84.3 | -1.3 | 80–89% |
| S04 | 1 | 8 | 84 | 84 | 0 | 80–89% |
| S04 | 1 | 9 | 79 | 78.7 | 0.3 | 70-75% |
| S04 | 1 | 10 | 78 | 77.9 | 0.1 | 70-75% |
| S04 | 1 | 11 | 75 | 74.9 | 0.1 | 70-75% |
| S04 | 1 | 12 | 73 | 73.9 | -0.9 | 70-75% |
| S04 | 2 | 1 | 99 | 99.9 | -0.9 | 90–100% |
| S04 | 2 | 2 | 99 | 99.9 | -0.9 | 90–100% |
| S04 | 2 | 3 | 94 | 94.2 | -0.2 | 90–100% |
| S04 | 2 | 4 | 93 | 93.4 | -0.4 | 90–100% |
| S04 | 2 | 5 | 88 | 88.5 | -0.5 | 80–89% |
| S04 | 2 | 6 | 87 | 88.2 | -1.2 | 80–89% |
| S04 | 2 | 7 | 83 | 83.4 | -0.4 | 80–89% |
| S04 | 2 | 8 | 83 | 83.1 | -0.1 | 80–89% |
| S04 | 2 | 9 | 77 | 77.5 | -0.5 | 70-75% |
| S04 | 2 | 10 | 77 | 76.8 | 0.2 | 70-75% |
| S04 | 2 | 11 | 72 | 72.2 | -0.2 | 70-75% |
| S04 | 2 | 12 | 72 | 71.9 | 0.1 | 70-75% |
| S05 | 1 | 1 | 98 | 98.2 | -0.2 | 90–100% |
| S05 | 1 | 2 | 98 | 98.7 | -0.7 | 90–100% |
| S05 | 1 | 3 | 93 | 93.2 | -0.2 | 90–100% |
| S05 | 1 | 4 | 93 | 92.8 | 0.2 | 90–100% |
| S05 | 1 | 5 | 88 | 88.1 | -0.1 | 80–89% |
| S05 | 1 | 6 | 88 | 87.6 | 0.4 | 80–89% |
| S05 | 1 | 7 | 85 | 83.9 | 1.1 | 80–89% |
| S05 | 1 | 8 | 84 | 84 | 0 | 80–89% |
| S05 | 1 | 9 | 79 | 76.3 | 2.7 | 70-75% |
| S05 | 1 | 10 | 78 | 75.8 | 2.2 | 70-75% |
| S05 | 1 | 11 | 76 | 73.3 | 2.7 | 70-75% |
| S05 | 1 | 12 | 75 | 72.8 | 2.2 | 70-75% |
| S05 | 2 | 1 | 99 | 99.9 | -0.9 | 90–100% |
| S05 | 2 | 2 | 100 | 100.1 | -0.1 | 90–100% |
| S05 | 2 | 3 | 92 | 92.6 | -0.6 | 90–100% |
| S05 | 2 | 4 | 93 | 92.3 | 0.7 | 90–100% |
| S05 | 2 | 5 | 88 | 87.6 | 0.4 | 80–89% |
| S05 | 2 | 6 | 88 | 87.8 | 0.2 | 80–89% |
| S05 | 2 | 7 | 85 | 83.4 | 1.6 | 80–89% |
| S05 | 2 | 8 | 83 | 83.6 | -0.6 | 80–89% |
| S05 | 2 | 9 | 79 | 77.8 | 1.2 | 70-75% |
| S05 | 2 | 10 | 78 | 76.7 | 1.3 | 70-75% |
| S05 | 2 | 11 | 74 | 71.3 | 2.7 | 70-75% |
| S05 | 2 | 12 | 72 | 72.3 | -0.3 | 70-75% |
| S06 | 1 | 1 | 98 | 98.7 | -0.7 | 90–100% |
| S06 | 1 | 2 | 98 | 98.6 | -0.6 | 90–100% |
| S06 | 1 | 3 | 93 | 93.4 | -0.4 | 90–100% |
| S06 | 1 | 4 | 93 | 93.2 | -0.2 | 90–100% |
| S06 | 1 | 5 | 88 | 87.8 | 0.2 | 80–89% |
| S06 | 1 | 6 | 88 | 88 | 0 | 80–89% |
| S06 | 1 | 7 | 84 | 84 | 0 | 80–89% |
| S06 | 1 | 8 | 84 | 84.1 | -0.1 | 80–89% |
| S06 | 1 | 9 | 78 | 77.9 | 0.1 | 70-75% |
| S06 | 1 | 10 | 76 | 76.8 | -0.8 | 70-75% |
| S06 | 1 | 11 | 75 | 74 | 1 | 70-75% |
| S06 | 1 | 12 | 74 | 73.2 | 0.8 | 70-75% |
| S06 | 2 | 1 | 99 | 99.9 | -0.9 | 90–100% |
| S06 | 2 | 2 | 99 | 99.8 | -0.8 | 90–100% |
| S06 | 2 | 3 | 92 | 93.9 | -1.9 | 90–100% |
| S06 | 2 | 4 | 92 | 93.3 | -1.3 | 90–100% |
| S06 | 2 | 5 | 87 | 87.7 | -0.7 | 80–89% |
| S06 | 2 | 6 | 86 | 87.5 | -1.5 | 80–89% |
| S06 | 2 | 7 | 84 | 84.5 | -0.5 | 80–89% |
| S06 | 2 | 8 | 83 | 84.4 | -1.4 | 80–89% |
| S06 | 2 | 9 | 79 | 78.4 | 0.6 | 70-75% |
| S06 | 2 | 10 | 78 | 78.7 | -0.7 | 70-75% |
| S06 | 2 | 11 | 75 | 73.4 | 1.6 | 70-75% |
| S06 | 2 | 12 | 74 | 73.8 | 0.2 | 70-75% |
| S07 | 1 | 1 | 99 | 98.7 | 0.3 | 90–100% |
| S07 | 1 | 2 | 99 | 98.8 | 0.2 | 90–100% |
| S07 | 1 | 3 | 88 | 89.7 | -1.7 | 90–100% |
| S07 | 1 | 4 | 90 | 90.1 | -0.1 | 90–100% |
| S07 | 1 | 5 | 84 | 84.7 | -0.7 | 80–89% |
| S07 | 1 | 6 | 84 | 84.1 | -0.1 | 80–89% |
| S07 | 1 | 7 | 80 | 80.7 | -0.7 | 80–89% |
| S07 | 1 | 8 | 80 | 81.4 | -1.4 | 80–89% |
| S07 | 1 | 9 | 79 | 78.8 | 0.2 | 70-75% |
| S07 | 1 | 10 | 78 | 79.1 | -1.1 | 70-75% |
| S07 | 1 | 11 | 70 | 72 | -2 | 70-75% |
| S07 | 1 | 12 | 69 | 71 | -2 | 70-75% |
| S07 | 2 | 1 | 100 | 99.6 | 0.4 | 90–100% |
| S07 | 2 | 2 | 100 | 99.5 | 0.5 | 90–100% |
| S07 | 2 | 3 | 93 | 89.4 | 3.6 | 90–100% |
| S07 | 2 | 4 | 90 | 90.4 | -0.4 | 90–100% |
| S07 | 2 | 5 | 86 | 85.7 | 0.3 | 80–89% |
| S07 | 2 | 6 | 86 | 86.3 | -0.3 | 80–89% |
| S07 | 2 | 7 | 81 | 79.2 | 1.8 | 80–89% |
| S07 | 2 | 8 | 80 | 79.5 | 0.5 | 80–89% |
| S07 | 2 | 9 | 75 | 73.1 | 1.9 | 70-75% |
| S07 | 2 | 10 | 73 | 73.2 | -0.2 | 70-75% |
| S07 | 2 | 11 | 69 | 71.9 | -2.9 | 70-75% |
| S07 | 2 | 12 | 69 | 71.4 | -2.4 | 70-75% |
| S08 | 1 | 1 | 98 | 99.1 | -1.1 | 90–100% |
| S08 | 1 | 2 | 98 | 98.6 | -0.6 | 90–100% |
| S08 | 1 | 3 | 90 | 89.2 | 0.8 | 90–100% |
| S08 | 1 | 4 | 92 | 89.9 | 2.1 | 90–100% |
| S08 | 1 | 5 | 86 | 85.6 | 0.4 | 80–89% |
| S08 | 1 | 6 | 86 | 85.2 | 0.8 | 80–89% |
| S08 | 1 | 7 | 83 | 81.9 | 1.1 | 80–89% |
| S08 | 1 | 8 | 83 | 81.8 | 1.2 | 80–89% |
| S08 | 1 | 9 | 77 | 77.3 | -0.3 | 70-75% |
| S08 | 1 | 10 | 77 | 76.2 | 0.8 | 70-75% |
| S08 | 1 | 11 | 74 | 74.1 | -0.1 | 70-75% |
| S08 | 1 | 12 | 74 | 73.3 | 0.7 | 70-75% |
| S08 | 2 | 1 | 99 | 99 | 0 | 90–100% |
| S08 | 2 | 2 | 99 | 99.2 | -0.2 | 90–100% |
| S08 | 2 | 3 | 92 | 93.1 | -1.1 | 90–100% |
| S08 | 2 | 4 | 92 | 91.5 | 0.5 | 90–100% |
| S08 | 2 | 5 | 86 | 87.1 | -1.1 | 80–89% |
| S08 | 2 | 6 | 87 | 86.7 | 0.3 | 80–89% |
| S08 | 2 | 7 | 82 | 82.9 | -0.9 | 80–89% |
| S08 | 2 | 8 | 83 | 82.5 | 0.5 | 80–89% |
| S08 | 2 | 9 | 78 | 78.8 | -0.8 | 70-75% |
| S08 | 2 | 10 | 79 | 78.8 | 0.2 | 70-75% |
| S08 | 2 | 11 | 76 | 76.6 | -0.6 | 70-75% |
| S08 | 2 | 12 | 76 | 75.6 | 0.4 | 70-75% |
| S09 | 1 | 1 | 99 | 98.6 | 0.4 | 90–100% |
| S09 | 1 | 2 | 99 | 99 | 0 | 90–100% |
| S09 | 1 | 3 | 95 | 94.1 | 0.9 | 90–100% |
| S09 | 1 | 4 | 95 | 94.3 | 0.7 | 90–100% |
| S09 | 1 | 5 | 89 | 87.8 | 1.2 | 80–89% |
| S09 | 1 | 6 | 89 | 88.1 | 0.9 | 80–89% |
| S09 | 1 | 7 | 83 | 82.1 | 0.9 | 80–89% |
| S09 | 1 | 8 | 84 | 82.4 | 1.6 | 80–89% |
| S09 | 1 | 9 | 78 | 77.8 | 0.2 | 70-75% |
| S09 | 1 | 10 | 78 | 77.3 | 0.7 | 70-75% |
| S09 | 1 | 11 | 75 | 73.5 | 1.5 | 70-75% |
| S09 | 1 | 12 | 72 | 72.2 | -0.2 | 70-75% |
| S09 | 2 | 1 | 100 | 99.9 | 0.1 | 90–100% |
| S09 | 2 | 2 | 100 | 99.7 | 0.3 | 90–100% |
| S09 | 2 | 3 | 95 | 93.9 | 1.1 | 90–100% |
| S09 | 2 | 4 | 94 | 93.1 | 0.9 | 90–100% |
| S09 | 2 | 5 | 87 | 86.9 | 0.1 | 80–89% |
| S09 | 2 | 6 | 86 | 84.4 | 1.6 | 80–89% |
| S09 | 2 | 7 | 86 | 84.1 | 1.9 | 80–89% |
| S09 | 2 | 8 | 86 | 84 | 2 | 80–89% |
| S09 | 2 | 9 | 78 | 75.3 | 2.7 | 70-75% |
| S09 | 2 | 10 | 78 | 76.5 | 1.5 | 70-75% |
| S09 | 2 | 11 | 77 | 75.3 | 1.7 | 70-75% |
| S09 | 2 | 12 | 75 | 74.8 | 0.2 | 70-75% |
| S10 | 1 | 1 | 98 | 99 | -1 | 90–100% |
| S10 | 1 | 2 | 98 | 99.1 | -1.1 | 90–100% |
| S10 | 1 | 3 | 92 | 93.9 | -1.9 | 90–100% |
| S10 | 1 | 4 | 93 | 93.8 | -0.8 | 90–100% |
| S10 | 1 | 5 | 86 | 87.3 | -1.3 | 80–89% |
| S10 | 1 | 6 | 86 | 87.3 | -1.3 | 80–89% |
| S10 | 1 | 7 | 84 | 83.6 | 0.4 | 80–89% |
| S10 | 1 | 8 | 83 | 83.5 | -0.5 | 80–89% |
| S10 | 1 | 9 | 76 | 77.2 | -1.2 | 70-75% |
| S10 | 1 | 10 | 75 | 75.6 | -0.6 | 70-75% |
| S10 | 1 | 11 | 75 | 76.8 | -1.8 | 70-75% |
| S10 | 1 | 12 | 77 | 76.1 | 0.9 | 70-75% |
| S10 | 2 | 1 | 99 | 99.8 | -0.8 | 90–100% |
| S10 | 2 | 2 | 99 | 99.8 | -0.8 | 90–100% |
| S10 | 2 | 3 | 93 | 92.8 | 0.2 | 90–100% |
| S10 | 2 | 4 | 91 | 92.6 | -1.6 | 90–100% |
| S10 | 2 | 5 | 86 | 87 | -1 | 80–89% |
| S10 | 2 | 6 | 86 | 86.3 | -0.3 | 80–89% |
| S10 | 2 | 7 | 82 | 82.1 | -0.1 | 80–89% |
| S10 | 2 | 8 | 81 | 81.9 | -0.9 | 80–89% |
| S10 | 2 | 9 | 75 | 75.4 | -0.4 | 70-75% |
| S10 | 2 | 10 | 73 | 75 | -2 | 70-75% |
| S10 | 2 | 11 | 70 | 72.9 | -2.9 | 70-75% |
| S10 | 2 | 12 | 73 | 72.6 | 0.4 | 70-75% |
| S11 | 1 | 1 | 98 | 98.5 | -0.5 | 90–100% |
| S11 | 1 | 2 | 98 | 98.4 | -0.4 | 90–100% |
| S11 | 1 | 3 | 92 | 92.3 | -0.3 | 90–100% |
| S11 | 1 | 4 | 92 | 92.5 | -0.5 | 90–100% |
| S11 | 1 | 5 | 89 | 88.2 | 0.8 | 80–89% |
| S11 | 1 | 6 | 89 | 87.8 | 1.2 | 80–89% |
| S11 | 1 | 7 | 78 | 78.8 | -0.8 | 80–89% |
| S11 | 1 | 8 | 79 | 78.7 | 0.3 | 80–89% |
| S11 | 1 | 9 | 72 | 73.7 | -1.7 | 70-75% |
| S11 | 1 | 10 | 72 | 73.1 | -1.1 | 70-75% |
| S11 | 1 | 11 | 75 | 76.5 | -1.5 | 70-75% |
| S11 | 1 | 12 | 78 | 78 | 0 | 70-75% |
| S11 | 2 | 1 | 100 | 99.7 | 0.3 | 90–100% |
| S11 | 2 | 2 | 100 | 99.9 | 0.1 | 90–100% |
| S11 | 2 | 3 | 93 | 93.3 | -0.3 | 90–100% |
| S11 | 2 | 4 | 93 | 93.1 | -0.1 | 90–100% |
| S11 | 2 | 5 | 88 | 88.3 | -0.3 | 80–89% |
| S11 | 2 | 6 | 88 | 87.7 | 0.3 | 80–89% |
| S11 | 2 | 7 | 83 | 83.5 | -0.5 | 80–89% |
| S11 | 2 | 8 | 83 | 82.6 | 0.4 | 80–89% |
| S11 | 2 | 9 | 77 | 78.5 | -1.5 | 70-75% |
| S11 | 2 | 10 | 76 | 77.8 | -1.8 | 70-75% |
| S11 | 2 | 11 | 72 | 75 | -3 | 70-75% |
| S11 | 2 | 12 | 72 | 74.7 | -2.7 | 70-75% |
| S12 | 1 | 1 | 100 | 98.6 | 1.4 | 90–100% |
| S12 | 1 | 2 | 100 | 98.8 | 1.2 | 90–100% |
| S12 | 1 | 3 | 96 | 94.5 | 1.5 | 90–100% |
| S12 | 1 | 4 | 95 | 93.6 | 1.4 | 90–100% |
| S12 | 1 | 5 | 92 | 89.8 | 2.2 | 80–89% |
| S12 | 1 | 6 | 91 | 89.3 | 1.7 | 80–89% |
| S12 | 1 | 7 | 84 | 83.1 | 0.9 | 80–89% |
| S12 | 1 | 8 | 84 | 82.4 | 1.6 | 80–89% |
| S12 | 1 | 9 | 77 | 77.4 | -0.4 | 70-75% |
| S12 | 1 | 10 | 77 | 76.5 | 0.5 | 70-75% |
| S12 | 1 | 11 | 72 | 72.6 | -0.6 | 70-75% |
| S12 | 1 | 12 | 73 | 72.7 | 0.3 | 70-75% |
| S12 | 2 | 1 | 100 | 99.9 | 0.1 | 90–100% |
| S12 | 2 | 2 | 100 | 99.9 | 0.1 | 90–100% |
| S12 | 2 | 3 | 96 | 93.6 | 2.4 | 90–100% |
| S12 | 2 | 4 | 96 | 93.7 | 2.3 | 90–100% |
| S12 | 2 | 5 | 89 | 88.3 | 0.7 | 80–89% |
| S12 | 2 | 6 | 89 | 87.5 | 1.5 | 80–89% |
| S12 | 2 | 7 | 80 | 79.3 | 0.7 | 80–89% |
| S12 | 2 | 8 | 80 | 79 | 1 | 80–89% |
| S12 | 2 | 9 | 77 | 76.9 | 0.1 | 70-75% |
| S12 | 2 | 10 | 77 | 76.7 | 0.3 | 70-75% |
| S12 | 2 | 11 | 75 | 74.3 | 0.7 | 70-75% |
| S12 | 2 | 12 | 73 | 74.1 | -1.1 | 70-75% |
| S13 | 1 | 1 | 99 | 98.4 | 0.6 | 90–100% |
| S13 | 1 | 2 | 99 | 98.3 | 0.7 | 90–100% |
| S13 | 1 | 3 | 93 | 91.4 | 1.6 | 90–100% |
| S13 | 1 | 4 | 92 | 91 | 1 | 90–100% |
| S13 | 1 | 5 | 86 | 84.4 | 1.6 | 80–89% |
| S13 | 1 | 6 | 88 | 85.4 | 2.6 | 80–89% |
| S13 | 1 | 7 | 84 | 82 | 2 | 80–89% |
| S13 | 1 | 8 | 83 | 81.8 | 1.2 | 80–89% |
| S13 | 1 | 9 | 76 | 78.3 | -2.3 | 70-75% |
| S13 | 1 | 10 | 74 | 77.3 | -3.3 | 70-75% |
| S13 | 1 | 11 | 75 | 75.1 | -0.1 | 70-75% |
| S13 | 1 | 12 | 74 | 74.6 | -0.6 | 70-75% |
| S13 | 2 | 1 | 99 | 98.1 | 0.9 | 90–100% |
| S13 | 2 | 2 | 99 | 98.2 | 0.8 | 90–100% |
| S13 | 2 | 3 | 96 | 92.2 | 3.8 | 90–100% |
| S13 | 2 | 4 | 94 | 92.4 | 1.6 | 90–100% |
| S13 | 2 | 5 | 89 | 86.8 | 2.2 | 80–89% |
| S13 | 2 | 6 | 89 | 87 | 2 | 80–89% |
| S13 | 2 | 7 | 88 | 85.4 | 2.6 | 80–89% |
| S13 | 2 | 8 | 87 | 85.6 | 1.4 | 80–89% |
| S13 | 2 | 9 | 82 | 79.9 | 2.1 | 70-75% |
| S13 | 2 | 10 | 81 | 79.9 | 1.1 | 70-75% |
| S13 | 2 | 11 | 78 | 76.2 | 1.8 | 70-75% |
| S13 | 2 | 12 | 78 | 76.5 | 1.5 | 70-75% |
| S14 | 1 | 1 | 98 | 98.2 | -0.2 | 90–100% |
| S14 | 1 | 2 | 98 | 98.4 | -0.4 | 90–100% |
| S14 | 1 | 3 | 92 | 93.9 | -1.9 | 90–100% |
| S14 | 1 | 4 | 93 | 93.7 | -0.7 | 90–100% |
| S14 | 1 | 5 | 89 | 89.9 | -0.9 | 80–89% |
| S14 | 1 | 6 | 89 | 89.5 | -0.5 | 80–89% |
| S14 | 1 | 7 | 84 | 84.5 | -0.5 | 80–89% |
| S14 | 1 | 8 | 83 | 84.3 | -1.3 | 80–89% |
| S14 | 1 | 9 | 78 | 79.1 | -1.1 | 70-75% |
| S14 | 1 | 10 | 78 | 78.9 | -0.9 | 70-75% |
| S14 | 1 | 11 | 73 | 75.2 | -2.2 | 70-75% |
| S14 | 1 | 12 | 74 | 75.2 | -1.2 | 70-75% |
| S14 | 2 | 1 | 99 | 99.6 | -0.6 | 90–100% |
| S14 | 2 | 2 | 99 | 99.4 | -0.4 | 90–100% |
| S14 | 2 | 3 | 91 | 92.5 | -1.5 | 90–100% |
| S14 | 2 | 4 | 91 | 92 | -1 | 90–100% |
| S14 | 2 | 5 | 85 | 85.4 | -0.4 | 80–89% |
| S14 | 2 | 6 | 85 | 86.1 | -1.1 | 80–89% |
| S14 | 2 | 7 | 81 | 82.6 | -1.6 | 80–89% |
| S14 | 2 | 8 | 82 | 82.5 | -0.5 | 80–89% |
| S14 | 2 | 9 | 77 | 77.5 | -0.5 | 70-75% |
| S14 | 2 | 10 | 76 | 77.9 | -1.9 | 70-75% |
| S14 | 2 | 11 | 73 | 74.7 | -1.7 | 70-75% |
| S14 | 2 | 12 | 72 | 74 | -2 | 70-75% |
| S15 | 1 | 1 | 100 | 98.7 | 1.3 | 90–100% |
| S15 | 1 | 2 | 100 | 98.7 | 1.3 | 90–100% |
| S15 | 1 | 3 | 95 | 94.1 | 0.9 | 90–100% |
| S15 | 1 | 4 | 94 | 94 | 0 | 90–100% |
| S15 | 1 | 5 | 89 | 89.2 | -0.2 | 80–89% |
| S15 | 1 | 6 | 88 | 89.2 | -1.2 | 80–89% |
| S15 | 1 | 7 | 85 | 85.6 | -0.6 | 80–89% |
| S15 | 1 | 8 | 85 | 85.2 | -0.2 | 80–89% |
| S15 | 1 | 9 | 78 | 79.3 | -1.3 | 70-75% |
| S15 | 1 | 10 | 76 | 79.2 | -3.2 | 70-75% |
| S15 | 1 | 11 | 76 | 76.5 | -0.5 | 70-75% |
| S15 | 1 | 12 | 74 | 76.2 | -2.2 | 70-75% |
| S15 | 2 | 1 | 99 | 98.3 | 0.7 | 90–100% |
| S15 | 2 | 2 | 99 | 98.6 | 0.4 | 90–100% |
| S15 | 2 | 3 | 94 | 93.8 | 0.2 | 90–100% |
| S15 | 2 | 4 | 94 | 94.1 | -0.1 | 90–100% |
| S15 | 2 | 5 | 88 | 88.5 | -0.5 | 80–89% |
| S15 | 2 | 6 | 88 | 88.5 | -0.5 | 80–89% |
| S15 | 2 | 7 | 81 | 82.4 | -1.4 | 80–89% |
| S15 | 2 | 8 | 81 | 82.4 | -1.4 | 80–89% |
| S15 | 2 | 9 | 78 | 79.1 | -1.1 | 70-75% |
| S15 | 2 | 10 | 77 | 79.6 | -2.6 | 70-75% |
| S15 | 2 | 11 | 72 | 75.2 | -3.2 | 70-75% |
| S15 | 2 | 12 | 71 | 74.8 | -3.8 | 70-75% |
| S16 | 1 | 1 | 97 | 96.4 | 0.6 | 90–100% |
| S16 | 1 | 2 | 97 | 96.7 | 0.3 | 90–100% |
| S16 | 1 | 3 | 90 | 91 | -1 | 90–100% |
| S16 | 1 | 4 | 90 | 91.1 | -1.1 | 90–100% |
| S16 | 1 | 5 | 86 | 85.2 | 0.8 | 80–89% |
| S16 | 1 | 6 | 83 | 85.4 | -2.4 | 80–89% |
| S16 | 1 | 7 | 79 | 80.9 | -1.9 | 80–89% |
| S16 | 1 | 8 | 78 | 80.5 | -2.5 | 80–89% |
| S16 | 1 | 9 | 74 | 75.6 | -1.6 | 70-75% |
| S16 | 1 | 10 | 74 | 74.7 | -0.7 | 70-75% |
| S16 | 1 | 11 | 69 | 70.8 | -1.8 | 70-75% |
| S16 | 1 | 12 | 69 | 69.9 | -0.9 | 70-75% |
| S16 | 2 | 1 | 99 | 97.6 | 1.4 | 90–100% |
| S16 | 2 | 2 | 98 | 98.3 | -0.3 | 90–100% |
| S16 | 2 | 3 | 89 | 90.3 | -1.3 | 90–100% |
| S16 | 2 | 4 | 89 | 89.9 | -0.9 | 90–100% |
| S16 | 2 | 5 | 83 | 85.1 | -2.1 | 80–89% |
| S16 | 2 | 6 | 83 | 85 | -2 | 80–89% |
| S16 | 2 | 7 | 82 | 82.2 | -0.2 | 80–89% |
| S16 | 2 | 8 | 81 | 82.2 | -1.2 | 80–89% |
| S16 | 2 | 9 | 74 | 76.4 | -2.4 | 70-75% |
| S16 | 2 | 10 | 74 | 76.5 | -2.5 | 70-75% |
| S16 | 2 | 11 | 72 | 74.9 | -2.9 | 70-75% |
| S16 | 2 | 12 | 73 | 74.4 | -1.4 | 70-75% |
| S17 | 1 | 1 | 99 | 98.5 | 0.5 | 90–100% |
| S17 | 1 | 2 | 99 | 98.8 | 0.2 | 90–100% |
| S17 | 1 | 3 | 94 | 92.5 | 1.5 | 90–100% |
| S17 | 1 | 4 | 94 | 92.9 | 1.1 | 90–100% |
| S17 | 1 | 5 | 88 | 87.5 | 0.5 | 80–89% |
| S17 | 1 | 6 | 86 | 87.4 | -1.4 | 80–89% |
| S17 | 1 | 7 | 81 | 82.6 | -1.6 | 80–89% |
| S17 | 1 | 8 | 81 | 82.6 | -1.6 | 80–89% |
| S17 | 1 | 9 | 76 | 77.7 | -1.7 | 70-75% |
| S17 | 1 | 10 | 76 | 78.2 | -2.2 | 70-75% |
| S17 | 1 | 11 | 70 | 73.5 | -3.5 | 70-75% |
| S17 | 1 | 12 | 70 | 73.2 | -3.2 | 70-75% |
| S17 | 2 | 1 | 100 | 99.7 | 0.3 | 90–100% |
| S17 | 2 | 2 | 100 | 99.7 | 0.3 | 90–100% |
| S17 | 2 | 3 | 93 | 92.5 | 0.5 | 90–100% |
| S17 | 2 | 4 | 92 | 92.5 | -0.5 | 90–100% |
| S17 | 2 | 5 | 86 | 86.5 | -0.5 | 80–89% |
| S17 | 2 | 6 | 85 | 86.4 | -1.4 | 80–89% |
| S17 | 2 | 7 | 81 | 82.6 | -1.6 | 80–89% |
| S17 | 2 | 8 | 81 | 82.4 | -1.4 | 80–89% |
| S17 | 2 | 9 | 77 | 77.7 | -0.7 | 70-75% |
| S17 | 2 | 10 | 75 | 77.4 | -2.4 | 70-75% |
| S17 | 2 | 11 | 71 | 72 | -1 | 70-75% |
| S17 | 2 | 12 | 69 | 72.6 | -3.6 | 70-75% |
| S18 | 1 | 1 | 99 | 98.3 | 0.7 | 90–100% |
| S18 | 1 | 2 | 99 | 98.2 | 0.8 | 90–100% |
| S18 | 1 | 3 | 92 | 90.9 | 1.1 | 90–100% |
| S18 | 1 | 4 | 92 | 90.1 | 1.9 | 90–100% |
| S18 | 1 | 5 | 85 | 83.7 | 1.3 | 80–89% |
| S18 | 1 | 6 | 85 | 83.4 | 1.6 | 80–89% |
| S18 | 1 | 7 | 82 | 80.2 | 1.8 | 80–89% |
| S18 | 1 | 8 | 83 | 80.5 | 2.5 | 80–89% |
| S18 | 1 | 9 | 78 | 77.2 | 0.8 | 70-75% |
| S18 | 1 | 10 | 78 | 76.5 | 1.5 | 70-75% |
| S18 | 1 | 11 | 75 | 73.7 | 1.3 | 70-75% |
| S18 | 1 | 12 | 75 | 72.4 | 2.6 | 70-75% |
| S18 | 2 | 1 | 100 | 99.6 | 0.4 | 90–100% |
| S18 | 2 | 2 | 100 | 99.5 | 0.5 | 90–100% |
| S18 | 2 | 3 | 94 | 92.6 | 1.4 | 90–100% |
| S18 | 2 | 4 | 94 | 92.2 | 1.8 | 90–100% |
| S18 | 2 | 5 | 88 | 87.4 | 0.6 | 80–89% |
| S18 | 2 | 6 | 89 | 87.2 | 1.8 | 80–89% |
| S18 | 2 | 7 | 82 | 81.4 | 0.6 | 80–89% |
| S18 | 2 | 8 | 82 | 81.3 | 0.7 | 80–89% |
| S18 | 2 | 9 | 77 | 77.4 | -0.4 | 70-75% |
| S18 | 2 | 10 | 78 | 76.1 | 1.9 | 70-75% |
| S18 | 2 | 11 | 75 | 74.1 | 0.9 | 70-75% |
| S18 | 2 | 12 | 76 | 74.4 | 1.6 | 70-75% |
